# Supplementary material
Source: Springer Nature journal article supplement (https://www.springermedizin.de/resource/supplementary/13054_2011_9554_MOESM5_ESM.pdf/9706462)
Supplement: MOESM5 [file 9706462]

**Table 3:** Nutritional parameters of the included patients

| Variable                                 | Study (n=53)     | Control (n=53)   | P value |
|------------------------------------------|------------------|------------------|---------|
| Nutritional Status (SGA), n (%)          |                  |                  |         |
| Well Nourished                           | 20 (37.7)        | 25 (47.2)        | NS      |
| Moderately Undernourished                | 22 (41.5)        | 21 (39.6)        | NS      |
| Severely Undernourished                  | 11 (20.8)        | 7 (13.2)         | NS      |
| Type of enteral feeding, n (%)           |                  |                  |         |
| Gastric                                  | 25 (47.2)        | 23 (43.4)        | NS      |
| Duodenal/Jenunal                         | 19 (35.8)        | 21 (39.6)        | NS      |
| Gastrostomy                              | 6 (11.3)         | 5 (9.4)          | NS      |
| Jejunostomy                              | 3 (5.7)          | 4 (7.6)          | NS      |
| Calculated caloric goal, Kcal/day*       | 1557 (1367-1812) | 1560 (1422-1820) | NS      |
| Calculated caloric volume, ml/day*       | 1038 (911-1208)  | 1040 (948-1213)  | NS      |
| Days receiving diet                      | 6.09±0.4         | 6.17±0.8         | NS      |
| Calories received per day, Kcal*         | 1538 (1295-1890) | 1523 (1370-1950) | NS      |
| Volume received per day, ml*             | 1025 (863-1260)  | 1015 (913-1300)  | NS      |
| Lipids received per day, g               | 96.04±37.2       | 49.8±19.0        | <0.0001 |
| Carbohydrates received per day, g        | 104.2±38.9       | 205.6±77.4       | <0.0001 |
| Proteins received per day, g             | 63.4±22.8        | 62.6±24.3        | NS      |
| EPA received per day, g                  | 4.6±1.8          | 0                | <0.0001 |
| GLA received per day, g                  | 4.4±1.7          | 0                | <0.0001 |
| DHA received per day, g                  | 2.05±0.7         | 0                | <0.0001 |
| Time to start enteral feeding, hours     | 8.4±2.6          | 7.6±3.1          | NS      |
| Time to reach 75% of caloric goal, hours | 35.2±8.7         | 32.0±6.4         | NS      |

\*Distribution considered as non-normal in accordance with the Shapiro-Wilks Test, values presented as medians (25% quartile-75% quartile) and p value calculated using the Wilcoxon Rank Sum Test;NS: The p values was considered non-significant ( $p > 0.05$ ); SGE: subjective global assessment of the nutritional status; EPA: Eicosapentaenoic acid; GLA: Gamma-linolenic acid; DHA: Docosahexaenoic acid
